# Supplementary material
Source: publisher figshare collection journal article supplement (https://tandf.figshare.com/articles/dataset/_/1605638)
Supplement: Supplementary file 1 [file 1]

Archive with 7 entries (7 files):
- raij_a_1110782_sm0140.pdf
- raij_a_1110782_sm0137.pdf
- raij_a_1110782_sm0133.pdf
- raij_a_1110782_sm0128.pdf
- raij_a_1110782_sm0123.pdf
- raij_a_1110782_sm0085.pdf
- raij_a_1110782_sm0006.pdf
