# Supplementary material
Source: publisher figshare collection journal article supplement (https://tandf.figshare.com/articles/dataset/_/1605638)
Supplement: Supplementary file 1 [file 1 › raij_a_1110782_sm0006.pdf]

# RADIOCARBON DATES FOR DARMSDEN-LINTON POTTERY FROM HUNTS HILL FARM

Sealey 2016, S01

This appendix gives details of the radiocarbon dates that allow the transition from Darmsden-Linton pottery to Middle Iron Age wares in Essex to be placed in the fourth century BC. There are three such dates from this site in Upminster parish and they come from residues on three sherds from two different - but unillustrated - pots found in the penannular gully of Round-house B103. Pottery from the house is specifically said to include ‘carinated bowls and either biconical and tripartite bowls’ (Cotton et al. 2011, 46); and two illustrated pots from B103 have parallels in Darmsden-Linton assemblages: Pot P57 (ibid., fig. 40) is the same as vessels from Linton itself (Fell 1953, fig.4 nos 19–20, and P60 is a plain (undecorated) version of one from Darmsden (Cunliffe 1968, fig. 3 no. 24). Other pottery from Hunts Hill Farm site has also been endorsed by Brudenell as Darmsden-Linton (Brudenell 2012, 31). The radiocarbon dates themselves are presented in Table 11, at the  $2\sigma$  confidence level. At the very least, they suggest that Darmsden-Linton pottery was still current in the first half of the fourth century BC and it seems reasonable to propose *c.* 350 BC as a convenient short-hand formula for the transition date with Middle Iron Age pottery. More details of the site are available in Sealey 2016, S03.

| laboratory number | radiocarbon age before present | calibrated date range |
|-------------------|--------------------------------|-----------------------|
| OxA-16658         | 2181 $\pm$ 28                  | 370-160 cal. BC       |
| OxA-16668         | 2209 $\pm$ 29                  | 390-190 cal. BC       |

|           |               |                 |
|-----------|---------------|-----------------|
| GrA-32961 | 2220 $\pm$ 40 | 400-170 cal. BC |
|-----------|---------------|-----------------|

Table 11. Radiocarbon dates for Darmsden-Linton Pottery from Hunts Hill Farm  
(after Bayliss et al. 2011, 122)
