# Supplementary material
Source: publisher figshare collection journal article supplement (https://tandf.figshare.com/articles/dataset/_/1605638)
Supplement: Supplementary file 1 [file 1 › raij_a_1110782_sm0085.pdf]

## DETAILS OF THE STANSTED AIRPORT, A120 AND A130

### EXCAVATIONS

Sealey 2016, S02

The Stansted Airport excavations examined an extensive tract of the boulder clay plateau in west Essex where the solid geology is chalk (Havis and Brooks 2004a, 4, 7; Brown et al. 2008, 13–14). There were two major campaigns, those undertaken by Essex County Council (Havis and Brook 2004a; 2004b) and — subsequently — by Framework Archaeology (Cooke et al. 2008). The latter examined 33.68 ha (ibid., 2).

The A120 project explored a 19 km stretch of road running from Stansted airport east towards Braintree (Timby et al. 2007). These road works involved a land-take of some 115 ha, made up of a narrow corridor 40–45 m wide (Timby 2007, 1). Its geology was varied and took in boulder clay, glacial sands and gravels, as well as alluvial deposits (ibid., 7).

The A130 excavations covered a 15 km stretch of the road from Chelmsford south to beyond Wickford (Dale et al. 2007). Here the corridor of land was sometimes as much as 100 m wide. Most of the terrain was on the intractable London Clay but with some stretches of the better drained clays, silts and sands of the Claygate Beds. Alluvial deposits were present in the vicinity of water courses (ibid., 10).
