# Supplementary material
Source: publisher figshare collection journal article supplement (https://tandf.figshare.com/articles/dataset/_/1605638)
Supplement: Supplementary file 1 [file 1 › raij_a_1110782_sm0123.pdf]

# THE FOURTEEN IRON AGE SITES IN ESSEX WITH FIVE OR MORE ROUNDHOUSES

Sealey 2016, S03

This appendix has brief accounts of the fourteen settlements. Sites are listed in alphabetical order of site name. Attention is focussed on the number of roundhouses present and their chronology, as well as on finds that might have come from houses that have not survived in the archaeological record.

## CURRY HILL CENTRAL

Curry Hill Central lay on the clay, silt and sand of the Claygate Beds, on soil that is more permeable than the intractable London Clay below. Five roundhouses were recovered (Illus. 3). We know that not all of them were contemporary because one was a replacement for its predecessor. The southernmost house was set in a small semi-circular ditched compound aligned on a rectilinear enclosure at least 40 by 30 m alongside to the north. One of the two roundhouses inside had been replaced by one with Early to Middle Iron Age pottery. Middle Iron Age pottery was present in the gully terminal of one of the two roundhouses found to the north-west. Late Iron Age pottery from the ditch of the rectilinear enclosure belongs to a period when the feature had gone out of use (Dale et al. 2007, 10, 23–25, 42).

## EAST OF LITTLE DUNMOW ROAD

East of Little Dunmow Road lay on boulder clay. In the Middle Iron Age there were four roundhouses along a 120 m stretch of the land corridor examined. There

was no sign of a surrounding ditch, and the settlement looks to have been unenclosed. In the Late Iron Age there were major changes. The entire area was divided up into a series of small rectilinear fields and compounds, with two roundhouses. Although not all the settlement was explored, there was apparently a contraction in population from the Middle to Late Iron Age, if the testimony of the houses can be trusted. Only a kilometre distant the same phenomenon was reported at Grange Lane (Site 49) where two Middle Iron Age roundhouses had no counterparts in the Late Iron Age. East of Little Dunmow Road itself petered out in the fifties AD (Powell 2007, 56–71; Powell and Biddulph 2007, 73, 76).

#### HUNTS HILL FARM

Hunts Hill Farm lay on a gravel plateau south of Upminster (Cotton et al. 2011, 27, 44–49, 53; Swift et al. 2011, 59–62; Bayliss et al. 2011, 122–23; Jones 2011, 126, 128) (Illus. 4). An extensive area was excavated; most of the Iron Age occupation lay in the northern sector. In the far north-west there was a small rectangular enclosure with two post-built roundhouses in much the same position, one evidently a replacement of its predecessor, House S123. All the other roundhouses at Hunts Hill Farm were recognized as such from their penannular gullies. A few metres to the east of this Enclosure S122 there was a larger rectangular enclosure, Enclosure S109, with four roundhouses. Houses B106 and B107 overlapped; Roundhouse B108 was two houses built in more or less the same position. Eight more roundhouses with penannular gullies were found to the east of these enclosures spread over an area some 125 by 100 m strung out east-west along a low ridge. The houses in question were B103, B109, B110, B114,

B115, B116, B117 and B150. At the southern end of the site there was another roundhouse, B122, and nearby another, smaller roundhouse, B147.

Elucidating settlement chronology is difficult. For one thing, hardly any of the pottery is illustrated, and for another the report simply divided the whole period into an earlier and a later phase lasting *c.* 800–400 BC and *c.* 400 BC–AD 43 respectively. The difficulties are compounded by the occasional reference in the text to the traditional tripartite division of the Iron Age into an Early, Middle and Late phase. Some of the pottery from the roundhouses is characterized as ‘carinated bowls and either biconical or tripartite jars’. From the very few vessels illustrated, one can see that this is pottery known otherwise as Darmsden-Linton. The six roundhouses associated with this ceramic are B103, B106, B107, B108 (two structures) and B110. B103 has an important set of three radiocarbon dates showing that Darmsden-Linton lasted until the fourth century BC as discussed in Appendix 1. No specific dates are given for the eight houses B109, B114, B115, B116, B117, B122, B147 and B150. As they are described in the earlier Iron Age section, one can only assume they are Earliest or Early Iron Age in terms of the chronological scheme outlined at the start of this paper.

It is claimed that there was occupation at Hunts Hill Farm from these early phases right down to the Roman invasion. One has reservations. It is said there were few Middle Iron Age features, and there is no reference to any roundhouses of Middle, or indeed Late Iron Age date. In fact one aspect of the pottery record suggests abandonment in the Middle Iron Age. Middle Iron Age sites in south Essex have vessels of form Little Waltham 13 in some numbers tempered with glauconite

(Sealey 1996, 50), but at Hunts Hill Farm there were only three sherds of such pottery. One of them came from Roundhouse B103 with its late Darmsden-Linton pottery where (despite what the report says) there is no need for it to be intrusive. The excavator herself remarked on the lack of form 13 bowls, and realised the implications (Greenwood 1997, 156–57).

No evidence is offered in the report to suggest Late Iron Age activity. Indeed, the first compelling sign of settlement at Hunts Hill Farm after the Early Iron Age is the defensive rectangular enclosure built by native Britons on the eve of the Roman invasion or in the conquest period itself *c.* AD 40–70. It may represent not the culmination of the prehistory of the site, but a new departure after a period of inactivity there.

#### IVY CHIMNEYS

This site on the outskirts of Witham was on chalky boulder clay with some small patches of flint gravel. Six roundhouses were found, although in two cases this interpretation of the features cannot be regarded as certain because little of the putative houses survived. Four houses were found inside an enclosure, and two more just outside. At the edges of the settlement there were four four-post structures, and a further five possible examples (Turner 1999, 3–4, 9–13, 18, 229, 231–32, 235–36). Although nearly half the pre-Belgic pottery was Early Iron Age, few definite structures of that date were found, and the character of activity at Ivy Chimneys then is unclear. Typologically, the Early Iron Age pottery falls late in the Darmsden-Linton sequence with vessels bearing the distinctive grooving on

the shoulder but without the emphatic carinations of earlier pottery (Turner-Walker and Wallace 1999, 125–27, 177).

The earliest roundhouse was apparently one of the two outside the enclosure, RH186. An Early Iron Age date is suggested by the circle of post-holes that defined it, a technique typical of houses of that date (Drury 1978, 127; Brown 1999, 177). Roundhouse RH185 was in much the same position. Although both houses overlapped, the stratigraphical relationship between the two could not be established. A Middle Iron Age sherd in the gully of RH185 fixes the date, and the predominance of flint-tempered pottery suggests a date early in the period (Turner 1999, 10–12, 229). On this view the two houses lie along the divide between the Early and Middle Iron Ages.

The other four houses lay inside the enclosure. Three were placed in the Middle Iron Age on the basis of associated pottery or stratigraphy. The fourth roundhouse had a polygonal plan; its pottery is simply described as Iron Age. At Little Waltham, polygonal house plans appeared towards the end of the life of the settlement (Drury 1978, 10–11, 14, 120–21, 125) and the Ivy Chimneys house was presumably built towards the end of the Middle Iron Age. These six roundhouses were excavated by B.R.G. Turner 1978–83. Another was dug by B. R. K. Dunnett in 1970 inside the Middle Iron Age enclosure. This seventh house was apparently contemporary because it overlapped the possible Middle Iron Age house F3191, and it is treated here as Middle Iron Age (Turner 1999, 3, 10, 12).

Late Iron Age activity was marked by a recut of the Middle Iron Age ditch; no houses were found, but the quantities of pottery and domestic debris show that people must have been living there.

## LITTLE WALTHAM

Most of the Iron Age settlement at Little Waltham lay on brickearth, with recent alluvium at the north end and London Clay at the far south (Allen 1978, 6). It began in Period 2 as a nucleated and unenclosed village of fifteen Middle Iron Age roundhouses with a rectangular shrine in the middle (Illus. 3). Its excavator felt that the houses in the Period 2 village could be divided into three architectural types, and that these types had chronological significance. In Period 3, the village was succeeded by two roundhouses to the north, set in a palisaded enclosure. There were also four-post structures in the Periods 2 and 3 settlements. Period 4 saw the erection of the last roundhouse, at a time when Aylesford-Swarling pottery made its first appearance on settlements in Essex *c.* 50–25 BC. This last building was a solitary farmstead on the site of the earlier Period 2 village (Drury 1978, 10–36, 124). More details are given in Tables 12–13. No other Late Iron Age finds or structures were present.

Since the Drury excavations, middle and late Iron Age ditches have been reported 650 m to the east, across the river Chelmer at Little Waltham Hall (Gilman 1994, 242). Otherwise the first subsequent feature was a rich cremation grave dated *c.* AD 50–60 found some 125 m south of the village, followed by a Romano-British field system (Drury 1978, 37–41).

| Period and Date               | House Numbers |
|-------------------------------|---------------|
| Period 2 <i>c.</i> 250–100 BC | 15            |
| Period 3 <i>c.</i> 100–50 BC  | 2             |
| Period 4 <i>c.</i> 50–25 BC   | 1             |

Table 12. Roundhouse incidence at Little Waltham

(after Drury 1978, 10)

| Period 2 Houses in Detail             | Number of Houses |
|---------------------------------------|------------------|
| Group A houses (typologically early)  | 4                |
| Group B houses (typologically middle) | 9                |
| Group C houses (typologically late)   | 2                |

Table 13. Period 2 Roundhouses at Little Waltham by architectural type

(after Drury 1978, 10–11, 14, 120–21)

## LOFTS FARM

The site was on a gravel terrace, with brickearth to the south of the Iron Age village itself. Excavation was undertaken in 1981–83 by the Maldon

Archaeological Group (hereafter MAG), directed by P. N. Brown. No final report has appeared but it is possible to offer a sketch of the settlement based on the privately printed interim reports produced by MAG and by the brief accounts in

the annual survey of Essex excavations that feature in the periodical *Essex Archaeology and History*. Wallis (1998, 232) has a useful summary of the entire work done by MAG at Lofts Farm, with a review of the published source material. To that should now be added the site archive housed at Colchester Museum, accession number 2001.105. MAG gave each of the fields they examined a letter, and the Middle Iron Age village was in Field N. It lay 800 m west of the contemporary village at Slough House Farm described below. On the crop-mark map of the area published by N. R. Brown (1988, fig.3), the village is in Area C. An updated crop-mark map is now available (Wallis and Waughman 1998, fig. 130).

The village is said to have had fourteen houses, most with entrances facing east. At least one can be discounted as a house because it was only 2.5 m in diameter; and on the basis of the house plans in the 1981–83 interim, only eleven of the structures in fact commend themselves as roundhouses. It was claimed that not all of them were contemporary, and indeed one house was rebuilt in the same position. The village straddled a north–south droveway just south of its junction with another droveway that approached from the south-west. Most of the houses were east of the droveway. Four-post structures, a well and a pond were also excavated. Eventually a rectangular enclosure 90 by 80 m with internal subdivisions was laid out over part of the village; pottery from its ditches was said to be Late Iron Age in date. A small hoard of copper-alloy bindings from a hide-shaped shield and a decorated toe-ring dated *c.* 100–25 BC was found in one of the house gullies (Brown 1985; Sealey 1996, 52, 54 for the date).

Having examined the pottery from Field N, the writer can report that it is almost all developed Middle Iron Age ware. Grog-tempered wheel-thrown pottery of Late Iron Age date is present, but is only a very modest proportion of the total and for this reason all eleven houses have been assigned to the Middle Iron Age here. Imports are represented by a local copy of an imported *terra rubra* beaker which will be later than *c.* 20 BC (Reinert 1992, 78 for the start date of Gallo-Belgic ware). No Roman period pottery was reported from the village, and it is clear that occupation ended before AD 43. Activity after *c.* 20 BC is apparent from the *terra rubra* copy, but in default of any evidence to the contrary it would seem that the settlement did not survive much, if at all later than *c.* 1 BC.

#### MOOR HALL FARM

One is unlikely to see a detailed final report on this important site in Rainham parish. The most recent statements on the settlement should be the starting point for any evaluation of the site, if only because the features are numbered, with plans (Cotton et al. 2011, 50–51, 53–4; Swift et al. 2011, 59; Jones 2011, 126, 128) but the extended interim report by the excavator (Greenwood 1982) remains indispensable, not least because it has drawings of twenty-nine Earliest to Middle Iron Age vessels not reproduced elsewhere. Tyers (1996, fig. 17.2) illustrates six more vessels — of mid-first century AD type — from the site.

The site itself was on a gravel spur with the Thames marshes to the south. Four roundhouses were assigned to an Earlier Iron Age and dated *c.* 800–400 BC: Structures B201, B203 (two houses built on the same spot) and B207. B203 and B207 lay just to the west of a long straight ditch known as S211, with B201 to the south (Illus. 5). Three more Iron Age roundhouses were assigned to a Later Iron Age of *c.* 400 BC to AD 43: Structures B202, B204 and B205 (Illus. 6). The earlier and later settlements were apparently in the same — northern — part of the site. To the south of these later houses there was a small enclosure known as S223, possibly a livestock compound. Roundhouse B202 can safely be assigned to the Middle Iron Age because it had thirteen glauconite-tempered sherds. A selection of Middle Iron Age pottery from the site is illustrated in the interim report (Greenwood 1982, fig. 4). Where Roundhouses B204 and B205 belong in the period *c.* 400 BC to AD 43 is not clear from the 2011 monograph, but the interim report comes to the rescue here. Greenwood (*ibid.*, 192) was adamant that there was ‘scant evidence of Late Iron Age occupation’ and if she had dug Late Iron Age roundhouses she would have said so. On this view the three ‘later’ Iron Age roundhouses of the 2011 account are actually Middle Iron Age.

The first definite sign of activity at Moor Hall Farm afterwards is a ditched rectangular enclosure dated *c.* AD 40–60 at the south of the excavated area, replaced by the end of the first century AD with a double-ditched enclosure on the same spot. Both enclosures bear every appearance of defended refuges in a position commanding wide views over the Thames. The insistence in the 2011 monograph that there must have been significant Late Iron Age settlement at Moor Hall Farm on the basis of these Early Roman enclosures is questionable

because such a premise would preclude new builds on what we would now call a green field site; and nowhere do any accounts of the site describe Late Iron Age activity or settlement.

Claims that the Late Iron Age pottery was residual in later features overlooks the extent to which pottery of Late Iron Age *type* remained in production and use for some decades after AD 43 as the Stanway site at Colchester shows. Funerary enclosures 3–5 there were in use from *c.* AD 35–45 until the Boudican revolt, on land with no occupation in the Late Iron Age. These pottery assemblages are markedly different to those from the nearby Roman legionary fortress and *colonia*, with grog-tempered fabrics dominating the scene (Benfield 2007, 270, 288–9). At Chelmsford, native vessel forms in grog-tempered fabrics remained in the ascendant even later *c.* AD 60–80, on a site not occupied *before* the Boudican revolt (Going 1987, 9 Fabrics 44–45, fig. 52).

## MUCKING

The site lay on a gravel terrace with patches of brickearth overlooking the Thames marshes to the east. Soils drained rapidly. Within living memory, a farmer told how crop failures were frequent there; the terrain was evidently ill-suited to arable farming (Clark 1993, 8). With over a hundred roundhouses ranging in date from Late Bronze Age to Roman from the 18.22 hectares examined, Mucking is one of the largest single concentrations of such structures in the country. At the time of writing the *published* source material includes the plans in the site atlas (*ibid.*) and the descriptions in interim reports (Jones 1968, 214, pls 48 & 49b; 1974, 186, 190, 193–6; 1979, 70–71; Jones and Jones 1975, 142, 145). Having said that, the

main source for what follows is the monograph on the prehistory of Mucking by C. J. Evans which he kindly made available in advance of publication (Evans et al. forthcoming).

The number of relevant roundhouses by phase is shown in Table 14. As the data stands at present, it has not been possible to satisfactorily disentangle an Earliest from an Early Iron Age, as elsewhere now for Essex. Machine stripping of top soil at Mucking will have destroyed sleeper-beam structures, but there was apparently at least one late Iron Age rectangular house that had survived. There must have been Iron Age buildings at Mucking which cannot be recognised in the archaeological record, largely because of the myriad post-holes. There are such dense concentrations of them in parts of the site that it would be possible to construe all sorts of structures in them, and lurking in those post-holes may well be post-built roundhouses without continuous wall trenches of the kind found elsewhere in Essex. Be that as it may, the preponderance of Middle Iron Age roundhouses is striking. In the interim reports on Mucking, Margaret and Tom Jones were indeed clearly of the view that many of their roundhouses were associated with pottery that we can now recognise as Middle Iron Age (Jones 1968, 214; Jones and Jones 1975, 142, fig. 48 nos 9–13, 145).

| period      | roundhouse numbers |
|-------------|--------------------|
| LBA to EIA  | 3                  |
| IA          | 5                  |
| EIA         | 4                  |
| EIA to MIA  | 9                  |
| MIA         | 40                 |
| MIA to LIA  | 4                  |
| LIA to EROM | 3                  |
| Total       | 68                 |

Table 14      Roundhouse numbers from Mucking by phase (after Evans et al. forthcoming)

The disparity in the number of Middle and Late Iron Age roundhouses is emphatic. As such, it points to settlement contraction. Finds from Mucking confirm a reduction in activity in the Late Iron Age. The coin list compiled by C. Haselgrove is given in Table 15. As the majority are potins, and so earlier than the late first century BC (Haselgrove 1989, 107), the fortunes of the site seem to have been in decline by then. This would also account for the low numbers of Colchester brooches noted by Haselgrove. Although there are Late Iron Age

cremations, none is richly furnished, and the impression is of a site that had little or no access to the wealth so evident elsewhere in the county.

| coin                        | number present |
|-----------------------------|----------------|
| flat-linear (Class I) potin | 6              |
| other potin                 | 2              |
| uninscribed bronze          | 2              |
| Cunobelin silver            | 1              |
| Cunobelin bronze            | 2              |
| uncertain bronze            | 2              |
| total                       | 14             |

Table 15. Iron Age coins from Mucking

(after Evans et al. forthcoming)

## ST OSYTH

The site was on glacial outwash sands and gravels, with a palaeochannel of silt and clay running across it from north to south (Illus. 7). Soils there were described as ideal - fertile, well-drained and easy to plough (Germany 2007, 3–4). What were apparently the earliest roundhouses at the Middle Iron Age settlement were the three erected in the south-east corner of the excavated area over a field system of narrow strip-fields. Subsequently a wide trackway that ran east-west was constructed. At the east end it had a funnel entrance with a narrow driveway that

led south. An easterly extension of this driveway ditch was cut through the site of two of these three earliest houses. Some 20 m to the north was the village of St Osyth proper with nine roundhouses in a ditched enclosure. Between the enclosure ditch and a northern continuation of the trackway ditch were a further four roundhouses. In the south-east corner of the site, three more roundhouses were built. Two of them were sited in rectangular compounds. There were not enough stratigraphical relationships to link all nineteen of the roundhouses at St Osyth to a unified scheme of settlement development, but the greatest number of houses standing at any one time might have fourteen (ibid. 43–58, 115–17).

The pottery was Middle Iron Age, with no Late Iron Age wares at all. The settlement had evidently come to an end sometime in the period when Middle Iron Age pottery was current *c.* 350–50 BC. A complete absence of later finds shows the abandonment was total and final. Narrowing down the date is difficult. There are two radiocarbon dates for the village from cremated human bone in Pit 60, and they fall between the fourth and second centuries cal. BC (Germany 2007, fig. 33 top right, 117; Hamilton et al. 2007, 102), but that does not take us much further.

### SLOUGH HOUSE FARM

The solid geology of this lower Blackwater valley site is London Clay, capped by some 2 m of silty gravel with lenses of brickearth, sand and clay (Wallis 1998, 5). Here stood a settlement of seven Middle Iron Age roundhouses, with an eighth that should be assigned to the Late Iron Age (Illus. 8). It was eventually defined by Enclosure C, the ditches of which did not silt up until the mid-first century AD

or later (ibid. 17–34). Some of the Middle Iron Age roundhouses would have been so close to the ditch that access would have been impeded or impossible had they been contemporary, and the houses in question must therefore have pre-dated the ditch. Roundhouse A had both Middle and Late Iron Age pottery in its gully (ibid. 20) suggesting it was standing when Late Iron Age pottery was first introduced, in which case it seems reasonable to think that the village came to an end in the second half of the first century BC.

No successor houses of pre-conquest date were identified, although it was conceded that mechanical stripping of top-soil had truncated features to the extent that evidence of houses built on sleeper-beams might have disappeared altogether. However, the stripping of Enclosure C took place under some archaeological supervision and no Late Iron Age houses of any kind were reported (ibid. 5, 34, 56). Alongside Enclosure C there was a bigger enclosure of rectangular form (Enclosure D) interpreted as a Late Iron Age stock compound. To the north there was a series of narrow strip fields, also of Late Iron Age date (ibid. 34–39).

After the abandonment of the earlier village, the landscape became agrarian with little sign of permanent occupation other than Roundhouse A; and the quantity of Late Iron Age pottery recovered was modest (Horsley and Wallace 1998, 142, 152). Environmental evidence shows the landscape was open grassland with some arable. Invasive bracken was not cleared, perhaps because of over-grazing (Wiltshire and Murphy 1998, 183, 196). In the mid-first century AD these fields became derelict and there would have been few natives left to notice the trackway

that sliced diagonally across this abandoned landscape in the Early Roman period (Wallis 1998, 56).

#### STANSTED AIRPORT CATERING SITE

The site lay on a chalky boulder clay plateau. Its excavators argued that only seven of the structures at the village were residential roundhouses (Havis and Brooks 2004b, 530–31, 533). Excluding rebuilds of houses in more or less the same position as an earlier house, my own estimate of the maximum number of roundhouses that could have been contemporary is nine (adding Structures 734/758 and 48 to the seven roundhouses proposed by the excavators) (Illus. 3).

The start date of the village is a difficult topic, partly because the inception date of *c.* 75 BC is nowhere explained, and partly because of shortcomings in the pottery report. Reservations about the start date have also been expressed elsewhere (Gruel and Haselgrove 2007, 254 n.14). One of the Dressel 1 amphoras dates *c.* 100 BC and it seems reasonable to shunt back the start date of the village to the end of the second or very beginning of the first century BC (Sealey 2009, 6 n.23). There were no imported table wares from the Roman world, suggesting the site had been abandoned before *c.* 25 BC when these imports got underway (Fitzpatrick and Timby 2002, 162). Dating individual roundhouses is difficult because five of them have no illustrated pottery to allow one to take analysis further; but having said that, the vessels from Houses 21 and 52 look later than *c.* 50 BC. Given that its stratigraphy shows it to be a repair of 21, the pottery from 25/486 should also be late. Apart from two bronze coins of Cunobelin (Van Arsdell and Northover 2004, 120) there is a dearth of Later Iron Age finds,

although some of the Nauheim-derivative and Colchester brooches will be pre-conquest (Major 2004, 121).

Although the site was derelict long before the Roman invasion, we know the sanctity of a rectangular shrine in the middle of the village was remembered by people in the neighbourhood because it was the scene of votive offerings in the Early Roman period before it was finally dismantled (Havis and Brooks 2004a, 104, 108). Otherwise Early Roman activity on the site is difficult to elucidate and might have been confined to 'casual delving' (Going 2004, 165) or the removal of any surviving standing timber (Havis and Brooks 2004b, 534).

#### STANSTED AIRPORT LTCP WESTERN SETTLEMENT

Like the Stansted ACS village, the LTCP western settlement was also on boulder clay (LTCP stands for long term car park). In the Middle Iron Age it consisted of a nucleated and unenclosed hamlet of five roundhouses. To judge by their positions, not all of the houses can have been contemporary. The settlement could not be excavated in its entirety, and the main focus of occupation may have lain further to the west. The latest house on the site was a sixth roundhouse, described as mid to Late Iron Age. Its pottery included grog-tempered sherds; if the mid to late date given the house means the associated pottery was a mixture of Middle and Late Iron Age wares, the building was presumably standing when Late Iron Age pottery was first introduced. If so, it seems reasonable to think that the village came to an end in the second half of the first century BC. With an internal diameter of only 7 m, this last house was much smaller than the earlier houses. At

some point the site was bounded by a trapezoidal ditched enclosure with internal bank which went out of use by the fifties AD (Cooke 2008, 84–85, 94–95).

### STRATFORD OLYMPIC PARK

This Iron Age settlement in Stratford (Powell 2012, 36, fig.3.7, 46–55, 59, 63–64, 411; Leivers 2012, 229–32; Grant et al. 2012, 379, 341) was sited on river gravels and alluvium near the east bank of the River Lea. Indeed, the two earliest roundhouses – Structures 2355 and 2356 - were less than 5 m from the bank of a former channel of the river. There were seven roundhouses in all (Illus. 9). The two earliest were cut by the ditch of a rectangular enclosure, the Phase 1 enclosure. To judge by the radiocarbon dates, no great interval need have elapsed between the two earliest houses and the cutting of the ditch. Later on, another enclosure was superimposed on the eastern half of the Phase 1 enclosure. Midway between two of the converging sides of the Phase 2 enclosure ditches was the best preserved roundhouse of all, Roundhouse 1940. We know flooding brought the settlement to an end because the village was sealed by three levels of alluvium, together up to 70 cm deep. After its abandonment, an unaccompanied inhumation was cut through this alluvium. Another unaccompanied inhumation had a radiocarbon date of 110 cal. BC–cal. AD 60. A third unaccompanied inhumation could also have post-dated the settlement. Illustrated pottery is Middle Iron Age. Radiocarbon dates put the inception and life of the settlement earlier, rather than later in the period. Pottery suggests abandonment was delayed until the second century. Roundhouse 1940 was apparently one of the last structures of the settlement, to judge by its position in the Phase 2 enclosure. Pottery from the house gully included a thick-walled shell-tempered storage pot with the thickened

rim so typical of south Essex shell-tempered ware (Leivers 2012, fig. 7.3 no.23, 232), a ceramic that only came to the fore at a late stage of the Middle Iron Age (Sealey 1996, 57). Another sherd from the site is decorated in the Mucking-Crayford style (Leivers 2012, fig. 7.3 no. 27, 232). Cunliffe (1982, 42) put its emergence in the second century BC and Dr M. J. Brudenell tells me that his work on the pottery from Mucking shows that such decorated sherds did indeed only emerge in the latter stages of the Middle Iron Age.

### UPHALL CAMP

Uphall Camp was a defended site on the well-drained Taplow-Mucking terrace gravels in Ilford on the east bank of the River Roding. An area of some 24 ha was enclosed, to make it the largest earthwork of its kind in the county. The penannular gullies of eleven roundhouses were recorded (Greenwood 2001, 211). The excavator felt that one of them might have been a barn on the grounds of its modest diameter of 7.2 m and the westerly orientation of the entrance (which would have promoted ventilation if it was a granary), although it is treated here as residential.

Pottery associated with the houses is exclusively Middle Iron Age, and a date towards the end of the period is indicated by the presence of shell-tempered ware. No Late Iron Age Aylesford-Swarling pottery was present (Greenwood 1988, 20; 1989, 100; 2001, 213–14). Two of the three potin coins from the site are the Class I type (Greenwood 1988, 20; 1989, 100) which was in circulation in the late second and early first centuries BC (Haselgrove 1989, 106; 1996, 121). It would seem the camp was abandoned in the first half of the first century BC (Greenwood

2001, 214; Greenwood et al. 2006, 43), and the site seems to have been occupied for a relatively short period of time *c.* 200–75 BC.
