# Supplementary material
Source: publisher figshare collection journal article supplement (https://tandf.figshare.com/articles/dataset/_/1605638)
Supplement: Supplementary file 1 [file 1 › raij_a_1110782_sm0128.pdf]

# ROUNDHOUSE FLOOR AREAS AS PROXY POPULATION INDICATORS

Sealey 2016 S04

In treating roundhouse numbers as reliable indices of population, it is assumed here that each and every roundhouse provided shelter for the same number of people. We should think of such people as a household, rather than as a family because in many societies they are not one and the same (Hingley 1990, 127). Quite apart from the inevitable variations in the size of the household (and therefore house populations), one knows that any such assumption about the sizes of households is invalid because of the range in sizes of houses, as gauged from their diameters (Harding 2009, 284–85). It is important to bear in mind that although the diameters of houses might appear to oscillate within a fairly narrow range, there is a disproportionate increase in floor space with diameter. This is clearly brought out by Lambrick in his study of roundhouses from the upper and middle Thames valley, where he gave data for house diameters and floor areas (Lambrick 2009, 141). His findings are given in Table 16, where the increase in floor space with diameter demonstrated is striking.

| Diameter of the Post-ring in Metres | Floor Space in Square Metres |
|-------------------------------------|------------------------------|
| 5-6                                 | 20                           |
| 7.5–8.5                             | 44–58                        |
| 9–10                                | 80                           |

Table 16. Floor-areas from Thames Valley roundhouses

(after Lambrick 2009, 141)

So a more subtle approach to houses as population quantifiers would be to work out floor areas for roundhouses for each phase of the Iron Age, and compare that data rather than house numbers. For the reasons explained in what follows, the exercise proved to be impractical.

The question turns on how we interpret the penannular gullies that indicate the presence of a house. The gap in the gully marks the entrance — often at the south-east — but the gullies themselves are often more difficult to interpret. There are at least two possibilities. Some are thought to have been eaves-drip gullies that caught rain water from the roof, or promoted drainage in the vicinity of the wall (Carter 1988, 121). Others were trenches that took the wall posts. A third possibility is that they represented a trench for posts that supported the roof. Theoretically therefore, one might expect an excavated roundhouse in Essex to have two concentric gullies, sometimes with an innermost ring of post-holes that served as additional roof supports. In fact, very few even have two concentric gullies, and an excavator has to try and decide what a single gully might represent.

To work out floor areas, one would need to know if any given penannular feature was the eaves-drip gully or the wall post trench. Eaves-drip gullies generally have v or u-shaped sections and can very occasionally be prolific in finds that accumulated when the feature was open, especially adjacent the entrance; sometimes there is evidence for one or more recuts when the gully was cleaned

out and restored to something like its original depth. Trenches for walls on the other hand tend to have steeper sides and flat bottoms (Powell and Biddulph 2007, 74). In practice however, it is not always easy to distinguish between both possibilities (Harding 2009, 44, 75).

The problem is further aggravated by the fact that very few wall posts of an Essex roundhouse were left to rot *in situ*. Some examples may be given. What we must now see as an Earliest Iron Age roundhouse at Lofts Farm had twenty-seven post-holes; only fourteen had post-pipes, showing that nearly half the timbers had been salvaged when the building was abandoned (Brown 1988, 257–58). Along the A120, House 8206 at East of Parsonage Lane had – unusually – two concentric penannular gullies, but the inner one (which must have been for the wall) had ‘no evidence for timbers’ (Powell and Biddulph 2007, 74). At St Osyth, some post-holes had cuts for the removal of timbers (Germany 2007, 53). Other post pipes can be oval at the top where posts had been rocked back and forth to remove them (Drury 1978, 23). Presumably what we are dealing with here is the salvaging of old and rotten (dry) timber for firewood; and rotten wood is more flammable (Avery 1986, 225).

What this means for the trenches dug for roundhouse walls is that once the timbers had been removed they would silt up in the same way as an eaves drip-gully. Indeed, the process was underway as soon as the post started to decay as that part of the ground saw accumulations of soil from above (Harding 2009, 46). Whatever its date, removal of posts from a roundhouse can capture occupation detritus in the holes that are left (Hummler 2005, 419–20). This would account for

the otherwise puzzling fills of trenches that must have been for wall posts but which can look like accumulations of occupation debris (Powell and Biddulph 2007, 75).

It is understandable that the excavators of penannular gullies in Essex are often non-committal about their interpretation (Havis and Brooks 2004b, 531; Powell and Biddulph 2007, 73). As there might be as much as a 50 cm gap between the inner lip of an eaves-drip gully and the wall of the roundhouse (Carter 1998, fig. 90), calculating floor space erroneously from what was actually an eaves-drip gully would seriously misrepresent the area available to the social unit that lived there. There is no indication in Essex that house size was a function of date, as seems to have been the case at Cat's Water in Cambridgeshire (Pryor 1984, 126). For these reasons it is best to treat house numbers as such as population indices, rather than attempt to work out floor areas.
