# Supplementary material
Source: publisher figshare collection journal article supplement (https://tandf.figshare.com/articles/dataset/_/1605638)
Supplement: Supplementary file 1 [file 1 › raij_a_1110782_sm0137.pdf]

# ROUNDHOUSES AND POPULATION DECLINE IN NORFOLK, SUFFOLK, HERTFORDSHIRE AND CAMBRIDGESHIRE

Sealey 2016, S06

One would like to know if the population decline in Middle to Late Iron Age Essex was replicated in neighbouring counties north of the Thames. But any attempt to repeat the exercise undertaken for Essex founders on two factors. One is the persistence of Middle Iron Age pottery in Norfolk, Suffolk and parts of Cambridgeshire until the Roman invasion. The other factor is the dearth of roundhouses.

Unlike Essex, where a Late Iron Age can be defined by the introduction of a new style of pottery, over much of East Anglia Middle Iron Age pottery remained current until the Roman invasion and beyond (Hill 2002, 155; Sealey 2007a, 30). This is most emphatically the case with Norfolk. In Suffolk there was some sporadic adoption of Aylesford-Swarling pottery. Burgh had significant quantities of wheel-thrown and grog-tempered pottery, but not until the early first century AD (Martin 1988, 34–35). The same was true of West Stow in the north-west of the county (Martin 1990), but at both sites this Aylesford-Swarling component in the ceramic repertoire was in use alongside earlier hand-made styles. This was not the case in most parts of Essex where Aylesford-Swarling pottery completely displaced earlier ceramics. In south Cambridgeshire we even have the situation at Caldecote where Aylesford-Swarling wares were displaced by pottery of Middle Iron Age type at the end of the Iron Age (Sealey 2011, 74); much the same happened at nearby Duxford (Lyons 2011, 120). All this means that one cannot

not use pottery in many parts of East Anglia to distinguish a Middle from a Late Iron Age roundhouse with the confidence one might in Essex.

Nor are there many roundhouses for us to date in East Anglia (Moore 2003, 53). It is disconcerting that there are so few of them in Norfolk, Suffolk and Hertfordshire, particularly when we bear in mind the wealth of the archaeological record there in terms of metalwork hoards, coinage, ceramics, elite burials and other categories of evidence. In fact, surveys of Iron Age settlement in Norfolk seldom mention houses of any kind (Davies 1996, 67–71; Ashwin 1999; Hutcheson 2003, 88). No wonder the four Middle Iron Age roundhouses from Harford Farm were hailed — with good reason — as ‘important additions to the corpus’ (Ashwin 2000, 136). One could say the same of the three roundhouses in their enclosure at Heacham (Tremlett et al. 2011, fig.3, 29–30). There is a candid admission of the dearth of evidence for roundhouses in Norfolk in the Harford Farm monograph (Ashwin and Bates 2000, 189). Moving south, Martin (1999, 63–70) could only list fifteen roundhouses from Iron Age Suffolk in his survey of the county.

The picture in Hertfordshire is the most exasperating of all because of the almost complete absence of the roundhouse from the Iron Age archaeology of the county. Syntheses of Iron Age settlement in Hertfordshire are equally remarkable for their reticence on the topic (Morris and Wainwright 1995; Hunn 1996; Bryant and Niblett 1997; Thompson 2005; Bryant 2007). Even the ‘roundhouse’ at Barley is a semi-circular shelter, rather than a house (Cra’ster 1961, 257; Havis and Brooks 2004a, 99).

Indeed there are more roundhouses of Iron Age type in Roman period contexts than for the pre-Roman period in Hertfordshire. There were three Roman ones at Baldock with 'hints of others' (Stead and Rigby 1986, 33, 36–38 for Buildings V, VI and VII); another one was excavated on the Baldock bypass (Clarke and Phillips 2009). At Gorhambury villa there were four more (Neal et al. 1990, 36, 40–41, fig.54). Like Essex, Hertfordshire saw the wholehearted adoption of Aylesford-Swarling pottery so we would be able to distinguish between Middle and Late Iron Age roundhouses but they are simply not there, with a very few exceptions such as the one – or possibly two – roundhouses from pre-Roman Gorhambury (ibid. fig. 28, 26, 29 for Buildings 6 and 11).

Before leaving Hertfordshire, it is worth considering the King Harry Lane cemetery (Stead and Rigby 1989) for the light it might shed on population dynamics. Fitzpatrick (1991, 326) showed that the incidence of graves over the first three phases of the cemetery increased with time. His findings are reproduced in Table 17, with two changes. The chronology is that proposed for the cemetery by Mackreth, explained by the writer elsewhere (Sealey 2009, 8–9). The other adjustment is a shift from grave numbers to the numbers of deceased, by taking account of the fact that eight of the cremations from Phases 1-3 had the remains of two individuals. If Hertfordshire had suffered the same population contraction as Essex, one could interpret the findings of Table 17 in terms of a demographic recovery from a low at the turn of the millennium and that would articulate well with the picture in Essex.

| Phase | Date        | Duration | Number of Deceased | Deaths per Annum |
|-------|-------------|----------|--------------------|------------------|
| 1     | 15 BC–AD 30 | 45 years | 74                 | 1.6              |
| 2     | AD 20–40    | 20 years | 96                 | 4.8              |
| 3     | AD 35–40/45 | 10 years | 152                | 15.2             |

Table 17 Deaths by phase at the King Harry Lane Cemetery

(after Fitzpatrick 1991, 326)

Returning to the central topic of this Appendix, the high number of roundhouses from Cambridgeshire is remarkable, particularly when one bears in mind that much of the Fens was under water in the Iron Age. The number of roundhouses bears comparison with Essex; and both counties throw into high relief the dearth of such structures from Norfolk, Suffolk and Hertfordshire. Some examples of Cambridgeshire settlements may be cited to illustrate the potential of the evidence. There were three roundhouses at Caldecote (Kenney and Lyons 2011, 69–70) and five at Haddenham V (Evans and Hodder 2006, 109–27). On the Isle of Ely there were four at Wardy Hill, eight more from Little Thetford, and no less than twenty-nine to thirty roundhouses from Hurst Lane (Evans 2003, 9, 39–44, 245–48). Further north in the county, at Cat’s Water, there were another twenty-five or so roundhouses (Pryor 1984, 126).

The most prolific source of Iron Age roundhouses in Cambridgeshire is the string of four settlements along 1.5 km of the Fen edge at Colne Fen. The presence there of wheel-thrown pottery of Aylesford-Swarling type allowed Middle and Late Iron Age roundhouses to be distinguished (Evans et al. 2013, 13, 153, 156, 164,

172, 174–76, 182–83; Webley 2013, 186, 188, 190). A summary is given in Table 18. Adjusting those roundhouse numbers to take account of the shorter duration of the Late Iron Age, the data shows an increase in house numbers moving from the Middle to Late Iron Age. That is quite the reverse of the Essex situation, but it is difficult to know if that is a county-wide trend in Cambridgeshire because of the sporadic adoption of Aylesford-Swarling pottery in the county.

| Site                     | MIA Roundhouses | LIA Roundhouses |
|--------------------------|-----------------|-----------------|
| Site I                   | 9               | 2               |
| Site IV                  | 16              | 4               |
| Site VII The Camp Ground |                 | 6               |
| The Plan Site            |                 | 4               |
| totals                   | 25              | 16              |

Table 18      The Incidence of roundhouses by period at Colne Fen  
(after Evans et al. 2013)
