# Supplementary material
Source: publisher figshare collection journal article supplement (https://tandf.figshare.com/articles/dataset/_/1605638)
Supplement: Supplementary file 1 [file 1 › raij_a_1110782_sm0140.pdf]

## A COMPLETE BIBLIOGRAPHY FOR THE ONLINE SUPPLEMENT

Sealey 2016, S07

ALLEN, R. H. 1978. Geology and soils, in Drury 1978, 2–6

ASHWIN, T. M. 1999. Studying Iron Age settlement in Norfolk, in Davies and Williamson (eds) 1999, 100–24

ASHWIN, T. M. 2000. Excavations at Bixley (Sites 6099, 9585), 1989–90. Excavations at Harford Farm, Caistor St Edmund (Site 9794), 1990, in Ashwin and Bates 2000, 9–140

ASHWIN, T. M. AND BATES, S. 2000. *Excavations on the Norwich Southern Bypass, 1989-91. Part I: Excavations at Bixley, Caistor St Edmund, Trowse, Cringleford and Little Melton*, East Anglian Archaeol. Rep., **91**, Gressenhall: Norfolk County Council

AVERY, M. 1986 ‘Stoning and fire’ at hillfort entrances of southern Britain, *World Archaeol.*, **18**, 216–30

BAYLISS, A., BRONK RAMSEY, C., MARSHALL, P., VAN DER PLICHT, J. AND WATSON, B. 2011. Radiocarbon dating, in Howell et al. 2011, 121–23

BENFIELD, S. F. 2007. The Late Iron Age and Roman pottery fabrics. The Late Iron Age and Roman pottery from the enclosure ditches and the ditches of ?mortuary enclosures BF32 and CF43-6, in Crummy et al. 2007, 268–71 and 274–89

BROWN, F., CRAMP, K. AND LEIVERS, M. 2008. The natural landscape, in Cooke et al. 2008, 11–16

BROWN, N. R. 1988. A Late Bronze Age enclosure at Lofts Farm, Essex, *Proc. Prehist. Soc.*, **54**, 249–302

BROWN, N. R. 1999. *The Archaeology of Ardleigh, Essex: Excavations 1955-1980*, East Anglian Archaeol. Rep., **90**, Chelmsford: Essex County Council

BROWN, P.N. 1985. The Late Iron Age hoard from Lofts Farm, *Essex J.*, **20**, part 2, 42-5

BRUDENELL, M. J. 2012. The prehistoric pottery, 24–31, in A. L. Lyons, High living at Marks Warren; a north-east London landscape from the Mesolithic to modern period, *Essex Archaeol. Hist.*, **2** for 2011, fourth ser., 3–57

BRYANT, S. R. 2007. Central places or special places? The origins and development of ‘oppida’ in C.C. Haselgrove and T.H. Moore (eds), 2007, *The Later Iron Age in Britain and Beyond*, 62-80, Oxford: Oxbow Books

BRYANT, S. R. AND NIBLETT, B. R. K. 1997. The Late Iron Age in Hertfordshire and the north Chilterns, in A. Gwilt and C.C. Haselgrove (eds) 1997, *Reconstructing Iron Age Societies: New Approaches to the British Iron Age*, 270-81, Oxbow Monogr., **71**, Oxford: Oxbow Books

CARTER, G. A. 1998. *Excavations at the Orsett 'Cock' Enclosure, Essex, 1976*, East Anglian Archaeol. Rep., **86**, Chelmsford: Essex County Council

CLARK, A. J. 1993. *Excavations at Mucking. Vol.1: The Site Atlas. Excavations by Margaret and Tom Jones*, English Heritage Archaeol. Rep., **20**, London: English Heritage

CLARKE, C. AND PHILLIPS, M. 2009. Area 4, in M. Phillips, *Four Millennia of Human Activity along the A505 Baldock Bypass, Hertfordshire*, 71–72, East Anglian Archaeol. Rep., **128**, Bedford: Albion Archaeology and Hertfordshire County Council

COOKE, N. M. 2008. Enclosing the landscape (c. 400 BC–100 BC). Hierarchy in the landscape (c. 100 BC–AD 60). A changing landscape (c. AD 60–270). Agricultural intensification (c. AD 270–400), in Cooke et al. 2008, 79–178

COOKE, N. M., BROWN, F. AND PHILLPOTTS, C. 2008. *From Hunter Gatherers to Huntsmen: A History of the Stansted Landscape*, Framework Archaeol. Monogr., **2**, Oxford and Salisbury: Framework Archaeology

COTTON, J. F., GREENWOOD, P. A., HOWELL, I., SWIFT, D., WATSON, B., BEVAN, L. AND JONES, P. 2011. The prehistoric landscape: settlement, subsistence and spirituality, in Howell et al. 2011, 21–57

CRA'STER, M. D. 1961. The Aldwick Iron Age settlement, Barley, Hertfordshire, *Proc. Cambridge Antiq. Soc.*, **54** for 1960, 22–46

CRUMMY, P. J., BENFIELD, S. F., CRUMMY, N. C., RIGBY, V. A. AND SHIMMIN, D. 2007. *Stanway: An Élite Burial Site at Camulodunum*, Britannia Monogr., **24**, London: Society for the Promotion of Roman Studies

CUNLIFFE, B. W. 1968. Early pre-Roman Iron Age communities in eastern England, *Antiq. J.*, **48**, 175–91

CUNLIFFE, B. W. 1982. Social and economic development in Kent in the pre-Roman Iron Age, in P. E. Leach (ed.) *Archaeology in Kent to AD 1500*, 40–50, Counc. Brit. Archaeol. Res. Rep., **48**, London: Council for British Archaeology

DALE, R., MAYNARD, D. AND COMPTON, J. 2007. Archaeology on the mid-Essex clay. Investigations on the A130 by-pass: A12 Chelmsford by-pass to the A127 Southend arterial road, 1991–94 and 1999–2002, *Essex Archaeol. Hist.*, **36** for 2005, third ser., 10–54

DAVIES, J. A. 1996. Where eagles dare: the Iron Age of Norfolk, *Proc. Prehist. Soc.*, **62**, 63–92

DAVIES, J.A. AND WILLIAMSON T.M. (eds), 1999. *Land of the Icení: The Iron Age in Northern East Anglia*, Studies in East Anglia History, **4**, Norwich: University of East Anglia

DRUCE, D. 2007. Pollen, in Timby et al. 2007, 369–75 on CD-Rom

DRURY, P. J. 1978. *Excavations at Little Waltham*,: Chelmsford Excavation Comm. Rep., **1**, and Counc. Brit. Archaeol. Res. Rep., **26**, Chelmsford and London: Chelmsford Excavation Committee and Council for British Archaeology

EVANS, C. J. 2003. *Power and Island Communities: Excavations at the Wardy Hill Ringwork, Coveney, Ely*, East Anglian Archaeol. Rep., **103**, Cambridge: Cambridge Archaeological Unit

EVANS, C. J. AND HODDER, I. A. 2006. *Marshland Communities and Cultural Landscapes from the Bronze Age to Present Day. The Haddenham Project Vol.2*, McDonald Inst. Archaeol. Res. Monogr., Cambridge: McDonald Institute for Archaeological Research

EVANS, C. J., BRUDENELL, M. J., PATTEN, R. AND REGAN, R. 2013. *Process and History: Prehistoric Communities at Colne Fen, Earith*, The Archaeology of the Lower Ouse Valley, **1**, Cambridge: Cambridge Archaeol. Unit Landscape Archives.

EVANS, C. J., APPLEBY, G. AND LUCY, S., forthcoming. *Lives in Land – Mucking Excavations by Margaret and Tom Jones, 1965-1978: Prehistory, Context and Summary*, Oxford: Oxbow Books

FELL, C. I. 1953. An Early Iron Age settlement at Linton, Cambridgeshire, *Proc. Cambridge Antiq. Soc.*, **46** for 1952, 31–42

FITZPATRICK, A. P. 1991. Death in a material world: the Late Iron Age and Early Romano-British cemetery at King Harry Lane, St Albans, Hertfordshire, *Britannia*, **22**, 323–27

FITZPATRICK, A. P. AND TIMBY, J. R. 2002. Roman pottery in Iron Age Britain, in Woodward and Hill (eds) 2002, 161–72

GERMANY, M. 2007. *Neolithic and Bronze Age Monuments, Middle Iron Age Settlement at Lodge Farm, St Osyth, Essex*, East Anglian Archaeol. Rep., **117**, Chelmsford: Essex County Council

GILMAN, P. J. (ed.) 1994. Archaeology in Essex, 1993, *Essex Archaeol. Hist.*, **25**, third ser., 239–57

GOING, C. J. 1987. *The Mansio and Other Sites in the South-eastern Sector of Caesaromagus: The Roman Pottery*, Chelmsford Archaeol. Trust Rep., **3.2**, and Counc. Brit. Archaeol. Res. Rep., **62**, Chelmsford and London: Chelmsford Excavation Committee and Council for British Archaeology

GOING, C. J. 2004. Pottery, in Havis and Brooks 2004a, 139–65

GRANT, M. J., NORCOTT, D., STEVENS, C. J. AND WYLES, S. F. 2012. Environmental and geoarchaeological investigations, in Powell 2012, 329–408

GREENWOOD, P. A. 1982. The cropmark site at Moor Hall Farm, Rainham, Essex, *London Archaeol.*, **4**, 185–93

GREENWOOD, P. A. 1988. Uphall Camp, Ilford, *Essex J.*, **23**, part **1**, 19–20

GREENWOOD, P. A., 1989. Uphall Camp, Ilford, Essex: an Iron Age fortification, *London Archaeol.*, **6**, 94–101

GREENWOOD, P. A. 1997. Iron Age London: some thoughts on *Current Knowledge and Problems* 20 years on, *London Archaeol.*, **8**, 153–61

GREENWOOD, P. A. 2001. Uphall Camp, Ilford – an up-date, *London Archaeol.*, **9**, 207–16

GREENWOOD, P. A., PERRING, D. AND ROWSOME, P. E. 2006. *From the Ice Age to Essex: A History of the People and Landscape of East London*, London: Museum of London

GRUEL, K. AND HASELGROVE, C. C. 2007. British potins abroad: a new find from central Gaul and the Iron Age in southeast England, in C. Gosden, H. Hamerow, P. de Jersey and G. Lock (eds) *Communities and Connections: Essays in Honour of Barry Cunliffe*, 240–62, Oxford: Oxford University Press

HAMILTON, W. D., BAYLISS, A., RAMSEY, C. B., MEADOWS, J. AND VAN DER PLICHT, H. 2007. Radiocarbon dating, in Germany 2007, 95–102

HARDING, D. W. 2009. *The Iron Age Round-house: Later Prehistoric Building in Britain and Beyond*, Oxford: Oxford University Press

HASELGROVE, C. C. 1989. The archaeology of British potin coinage, *Archaeol. J.*, **145** for 1988, 99–122

HASELGROVE, C. C. 1996. Potin coinage in Iron Age Britain, archaeology and chronology, *Gallia*, **52** for 1995, 117-27

HAVIS, R. AND BROOKS, H. 2004a. *Excavations at Stansted Airport, 1986–91. Vol.1: Prehistoric and Romano-British* Chelmsford: East Anglian Archaeol. Rep., **107**, Chelmsford: Essex County Council

HAVIS, R. AND BROOKS, H. 2004b. *Excavations at Stansted Airport, 1986–91. Vol.2: Saxon, Medieval and Post-medieval; Discussion*, East Anglian Archaeol. Rep., **107**, Chelmsford: Essex County Council

HILL, J. D. 2002. Just about the potter's wheel? Using, making and depositing middle and later Iron Age pots in East Anglia, in Woodward and Hill (eds) 2002, 143–60

HINGLEY, R. C. 1990. Domestic organisation and gender relations in Iron Age and Romano-British households, in R. Samson (ed.) *The Social Archaeology of Houses*, 125–47, Edinburgh: Edinburgh University Press

HORSLEY, K. AND WALLACE, C. R. 1998. The Late Iron Age and Roman pottery, in Wallis and Waughman 1998, 142–57

HUMMLER, M. R. 2005. Before Sutton Hoo: the prehistoric settlement (c. 3000 BC to c. AD 550), in M. O. H. Carver, *Sutton Hoo: A Seventh-century Princely Burial Ground and Its Context*, Res. Rep. Soc.. Antiqs, **69**, 391–458, London: Society of Antiquaries of London

HUMPHREY, J. (ed.), 2003. *Re-searching the Iron Age: Selected Papers from the Proceedings of the Iron Age Research Student Seminars, 1999 and 2000*, Leicester Archaeol. Monogr., **11**, Leicester: University of Leicester

HUNN, J. R. 1996. *Settlement Patterns in Hertfordshire: A Review of the Typology and Function of Enclosures in the Iron Age and Roman Landscape*, Oxford: Brit. Archaeol. Rep. Brit. Ser., **249**

HUTCHESON, N. C. G. 2003. Material culture in the landscape: a new approach to the Snettisham hoards, in Humphrey (ed.) 2003, 87–95

JONES, M. U. 1968. Crop-mark sites at Mucking, Essex, *Antiq. J.*, **48**, 210–30

JONES, M. U. 1974. Excavations at Mucking: a second interim report, *Antiq. J.*, **54**, 183–99

JONES, M. U. 1979. Mucking, Essex: the reality beneath the crop marks, *Aerial Archaeol.* **4**, 65–76

JONES, M. U. AND JONES, W. T. 1975. The crop-mark sites at Mucking, Essex, England, in R. L. S. Bruce-Mitford (ed.) *Recent Archaeological Excavations in Europe*, 133–87, London: Routledge and Kegan Paul

JONES, P. 2011. The fabrics of the pre-Late Iron Age pottery, in Howell et al. 2011, 124–28

KENNEY, S. AND LYONS, A. L. 2011. An Iron Age banjo enclosure and contemporary settlement at Caldecote, Cambridgeshire, *Proc. Cambridge Antiq. Soc.*, **100**, 67–84.

LAMBRICK, G. H. 2009. Hearth and home: buildings and domestic culture, in G. H. Lambrick and M. A. Robinson, *The Thames through Time. The Archaeology of the Gravel Terraces of the Upper and Middle Thames. The Thames Valley in Later Prehistory: 1500 BC–AD 50*, Thames Valley Landscapes Monogr., **29**, 133–78, Oxford: Oxford Archaeology

LEIVERS, M. 2012. Prehistoric pottery, in Powell 2012, 223–32

LYONS, A. L. 2011. *Life and Afterlife at Duxford, Cambridgeshire: Archaeology and History in a Chalkland Community*, East Anglian Archaeol. Rep., **141**, Bar Hill: Oxford Archaeology East

MAJOR, H. J. 2004. Brooches, in Havis and Brooks 2004a, 121–28

MARTIN, E. A. 1988. *Burgh: Iron Age and Roman Enclosure*, East Anglian Archaeol. Rep., **40**, Ipswich: Suffolk County Council

MARTIN, E. A. 1990. Commentary on the illustrated Iron Age pottery, in S. E. West, *West Stow, Suffolk: The Prehistoric and Romano-British Occupations*, 65-8, East Anglian Archaeol. Rep., **48**, Bury St Edmunds: Suffolk County Council

MARTIN, E. A. 1999. Suffolk in the Iron Age, in Davies and Williamson (eds) 1999, 44–99

MOORE, T. H. 2003. Rectangular houses in the British Iron Age? ‘Squaring the circle’, in Humphrey (ed.) 2003, 47–58

MORRIS, M. AND WAINWRIGHT, A. 1995. Iron Age and Romano-British settlement, agriculture and industry in the upper Bulbourne valley, Hertfordshire: an interim interpretation, in R. D. C. Holgate (ed.) *Chiltern Archaeology: Recent Work - A Handbook for the Next Decade*, 68–75, Dunstable: The Book Castle

NEAL, D. S., WARDLE, A. AND HUNN, J. R. 1990. *Excavation of the Iron Age, Roman and Medieval Settlement at Gorhambury, St Albans*, English Heritage Archaeol. Rep., **14**, London: English Heritage

NICHOLLS, F. 2008. Finger ring and potin coin from the Great Tey Iron Age enclosure, *Colchester Archaeol. Grp Ann. Bull.*, **48**, 31

PARTRIDGE, C. R. 1981. *Skeleton Green: A Late Iron Age and Romano-British Site*, Britannia Monogr., **2**, London: Society for the Promotion of Roman Studies

PAYNE, A. 2006. Hillfort studies and the Wessex Project in A. Payne, M. Corney and B.W. Cunliffe, *The Wessex Hillforts Project: Extensive Survey of Hillfort Interiors in Central Southern England*, 1–38, London: English Heritage

PICKSTONE, A. AND MORTIMER, R. 2012. War Ditches, Cherry Hinton: revisiting an Iron Age hillfort, *Proc. Cambridge Antiq. Soc.*, **101**, 31–59

POWELL, A. B. 2007. The first settlers: prehistoric activity, in Timby et al. 2007, 13–72

POWELL, A. B. 2012. *By River, Fields and Factories: The Making of the Lower Lea Valley. Archaeological and Cultural Heritage Investigations on the Site of the London 2012 Olympic and Paralympic Games*, Wessex Archaeol. Rep., **29**, Salisbury: Wessex Archaeology

POWELL, A. B. AND BIDDULPH, E. 2007. Discussion, in Timby et al. 2007, 73–80

PRYOR, F. M. M. 1984. *Excavations at Fengate Peterborough, England: The Fourth Report*, Northamptonshire Archaeol. Soc. Monogr., **2**, and Royal Ontario Mus. Archaeol. Monogr., **7**, Toronto and Northampton: Northamptonshire Archaeological Society and Royal Ontario Museum

REINERT, F. 1992. Les débuts de la céramique gallo-belge en pays trévire: l'exemple des sépultures dites 'aristocratiques', in L. Rivet (ed.), *Société française d'étude de la céramique antique en Gaule: Actes du Congrès d' Tournai*, 71–81, Marseille: Société française d'étude de la céramique antique en Gaule

SCAIFE, R. 1991. Pollen analysis of the Iron Age land surface, 35–36, in O. R. Bedwin, Asheldam Camp - an Early Iron Age hill fort: the 1985 excavations, *Essex Archaeol. Hist.* **22**, 13–37

SEALEY, P. R. 1996. 'The Iron Age of Essex', in O. R. Bedwin (ed.) *The Archaeology of Essex: Proceedings of the Writtle Conference*, 46–68, Chelmsford: Essex County Council

SEALEY, P. R. 2007. *A Late Iron Age Warrior Burial from Kelvedon, Essex*, East Anglian Archaeol. Rep., **118**, Colchester: Colchester Museum Service

SEALEY, P. R. 2009. New light on the wine trade with Julio-Claudian Britain, *Britannia*, **40**, 1–40

SEALEY, P. R. 2011. The Middle and Late Iron Age pottery. Fired clay, 70–80, in S. Kenney and A. L. Lyons, An Iron Age banjo enclosure and contemporary settlement at Caldecote, Cambridgeshire, *Proc. Cambridge Antiq. Soc.*, **100**, 67–84

SKIPPINS, P. 2006. A curvilinear crop mark at Tey Brook Farm, Great Tey, *Colchester Archaeol. Grp. Ann. Bull.*, **46**, 4–14

STEAD, I. M. AND RIGBY, V. A. 1986. *Baldock: The Excavation of a Roman and Pre-Roman Settlement, 1968-72*, Britannia Monogr., **7**, London: Society for the Promotion of Roman Studies

STEAD, I. M. and RIGBY, V. A. 1989. *Verulamium: The King Harry Lane Site*, English Heritage Archaeol. Rep., **12**, London: English Heritage

SWIFT, D., WATSON, B. AND FEATHERBY, R. 2011. Romanisation: fortifications, farms and burial grounds, in Howell et al. 2011, 58–85

THOMPSON, I. M. 2005. St Albans in prehistory. Verlamion in the late pre-Roman Iron Age, in B. R. K. Niblett and I. M. Thompson, *Alban's Buried Towns: An Assessment of St Albans' Archaeology up to AD 1600*, 16–40, Oxford: Oxbow Books

TIMBY, J.R., 2007. Introduction, in Timby et al. 2007, 1-9

TIMBY, J. R., BROWN, R., BIDDULPH, E., HARDY, A. AND POWELL, A. B. 2007. *A Slice of Rural Essex: Recent Archaeological Discoveries from the A120 between Stansted Airport and Braintree*, Oxford Wessex Archaeology Monogr., **1**, Oxford and Salisbury: Oxford Archaeology and Wessex Archaeology

TREMLETT, S., ALBONE, J. AND HORLOCK, S. 2011. Iron Age landscapes from the air: results from the Norfolk national mapping programme, in J. A. Davies (ed.) *The Iron Age in Northern East Anglia: New Work in the Land of the Iceni*, 25–39, Oxford: Brit. Archaeol. Rep. Brit. Ser., **549**

TURNER, B. R. G. 1999. *Excavations of an Iron Age Settlement and Roman Religious Complex at Ivy Chimneys, Witham, Essex 1978–83*, East Anglian Archaeol. Rep., **88**, Chelmsford: Essex County Council

TURNER-WALKER, C. AND WALLACE, C. R. 1999. The Iron Age and Roman Pottery, in Turner 1999, 123–79

TYERS, P. A. 1996. Late Iron Age and Early Roman pottery traditions of the London region, in J. Bird, M. W. C. Hassall and H. L. Sheldon (eds) *Interpreting Roman London: Papers in Memory of Hugh Chapman*, 139-45, Oxbow Monogr., **58**, Oxford: Oxbow Books

VAN ARSDELL, R. D. AND NORTHOVER, J. P. 2004. Ancient British coins, in Havis and Brooks 2004a, 115–20

VAUGHAN-WILLIAMS, A. 2010. Analysis of the archaeobotanical remains, 95-6, in P. Boyer, Excavations at Southern Slopes, on land at Rectory Close, Colchester, *Essex Archaeol. Hist.*, **40** for 2009, 92–97

WALLIS, S. P. 1998. Excavations at Slough House Farm. Excavations at Howell's Farm. The Maldon Archaeological Group's Lofts Farm project, in Wallis and Waughman 1998, 5-58, 109–21 and 232

WALLIS, S. P. AND WAUGHMAN, M. 1998. *Archaeology and the Landscape in the Lower Blackwater Valley*, East Anglian Archaeol. Rep., **82**, Chelmsford: Essex County Council

WAUGHMAN, M. 1998. Excavations at Chigborough Farm, in Wallis and Waughman 1998, 59–108

WEBLEY, L. 2013. Later prehistoric pottery, in C. J. Evans, M. J. Brudenell, R. Patten and R. Regan, *Process and History: Prehistoric Communities at Colne Fen, Earith*, 185–97, *The Archaeology of the Lower Ouse Valley*, **1**, Cambridge: Cambridge Archaeol. Unit Landscape Archives

WILTSHIRE, P. E. J. 2007. The palynological analysis of the palaeoturf forming the collapsed mound in the Chamber CF42, in Crummy et. al. 2007, 398–99

WILTSHIRE, P. E. J. AND MURPHY, P. L. 1998. An analysis of plant microfossils and macrofossils from waterlogged deposits at Slough House and Chigborough Farms, in Wallis and Waughman 1998, 172–96

WOODWARD, A. B. AND HILL, J. D. (eds) 2002. *Prehistoric Britain: The Ceramic Basis*, Prehist. Ceramics Res. Grp. Occ. Pub., **3**, Oxford: Oxbow Books
